# Supplementary material
Source: publisher figshare collection journal article supplement (https://aacr.figshare.com/articles/dataset/_/22402394)
Supplement: Supplementary file 1 [file 39848189]

**Supplementary Table S3**

## A. Effects of CD44 variant over-expression on tumor initiation potential

| Over-expression                                                    | Cell dose | Number of mice with tumors/Number of mice injected (%) |                 |                  |
|--------------------------------------------------------------------|-----------|--------------------------------------------------------|-----------------|------------------|
|                                                                    |           | Vector                                                 | CD44v           | CD44s            |
|                                                                    | 1000      | 16/16 (100%)                                           | 16/16 (100%)    | 16/16 (100%)     |
|                                                                    | 100       | 15/21 (71%)                                            | 19/21 (90%)     | 16/21 (76%)      |
|                                                                    | 20        | 2/24 (8%)                                              | 8/24 (33%)      | 3/24 (13%)       |
| Estimated number of cancer initiating cells (Confidence intervals) |           | 1 in 100 (62-161)                                      | 1 in 46 (30-70) | 1 in 84 (53-133) |

B. Expression of siRNA-refractory gene *CD44v8-10* (*rCD44v*) rescued the tumor initiation potential of TMK1 cells in which the endogenous total CD44 is silenced

| siRNA-refractory gene                                              | Cell dose | Number of mice with tumors/Number of mice injected (%) |                   |                 |
|--------------------------------------------------------------------|-----------|--------------------------------------------------------|-------------------|-----------------|
|                                                                    |           | Vector                                                 | <i>rCD44s</i>     | <i>rCD44v</i>   |
|                                                                    | 2000      | 4/4 (100%)                                             | 4/4 (100%)        | 4/4 (100%)      |
|                                                                    | 200       | 4/10 (40%)                                             | 7/10 (70%)        | 10/10 (100%)    |
|                                                                    | 20        | 3/20 (15%)                                             | 2/20 (10%)        | 11/20 (55%)     |
| Estimated number of cancer initiating cells (Confidence intervals) |           | 1 in 274 (127-590)                                     | 1 in 172 (87-339) | 1 in 25 (14-46) |
